# Supplementary material for: Fabrication of biocompatible high aspect ratio Au–Ni coaxial nanorod arrays using the electroless galvanic displacement reaction method
Source: Royal Society of Chemistry journal article supplement (doi:10.1039/c4ra00773e), 2014-01-01
Supplement: c4ra00773e2.pdf [file c4ra00773e2.pdf]

Supplementary data for

**Biocompatible high aspect ratio Au-Ni coaxial nanorod arrays fabrication using  
the electroless Galvanic displacement reaction method**

Che-Wei Hsu<sup>1</sup>, Ching-Wen Li<sup>2</sup>, and Gou-Jen Wang<sup>1,2,3\*</sup>

<sup>1</sup> Department of Mechanical Engineering, National Chung-Hsing University,  
Taichung 40227, Taiwan

<sup>2</sup>Ph.D. Program in Tissue Engineering and Regenerative Medicine, National Chung-  
Hsing University, Taichung 40227, Taiwan

<sup>3</sup>Graduate Institute of Biomedical Engineering, National Chung-Hsing University,  
Taichung 40227, Taiwan

**Movies for dynamic 2D swing and rotation of the Au/Ni coaxial nanorods**

Nanoscale 2D swing and rotation of the Au/Ni coaxial nanorods could be well driven by the two-dimensional electromagnetic actuating system. Captions for the movies are as follows.

**Movie S1:** 2D swing of the Au/Ni coaxial nanorods driven by the two-dimensional electromagnetic actuating system

**Movie S2:** 2D rotation of the Au/Ni coaxial nanorods driven by the two-dimensional electromagnetic actuating system
